# Supplementary material
Source: publisher figshare collection journal article supplement (https://tandf.figshare.com/ndownloader/files/15338981)
Supplement: Supplementary file 1 [file 15338981]

| **Table S1**: Optical density and dry weight biomass linear correlation | | | |
| --- | --- | --- | --- |
| **Strain** | **Equation** | **R2** | **Optical density range at 750 nm** |
| **21.99** |  | 0.9961 | 0.118 to 0.930 |
| **257.80** |  | 0.9952 | 0.014 to 0.890 |


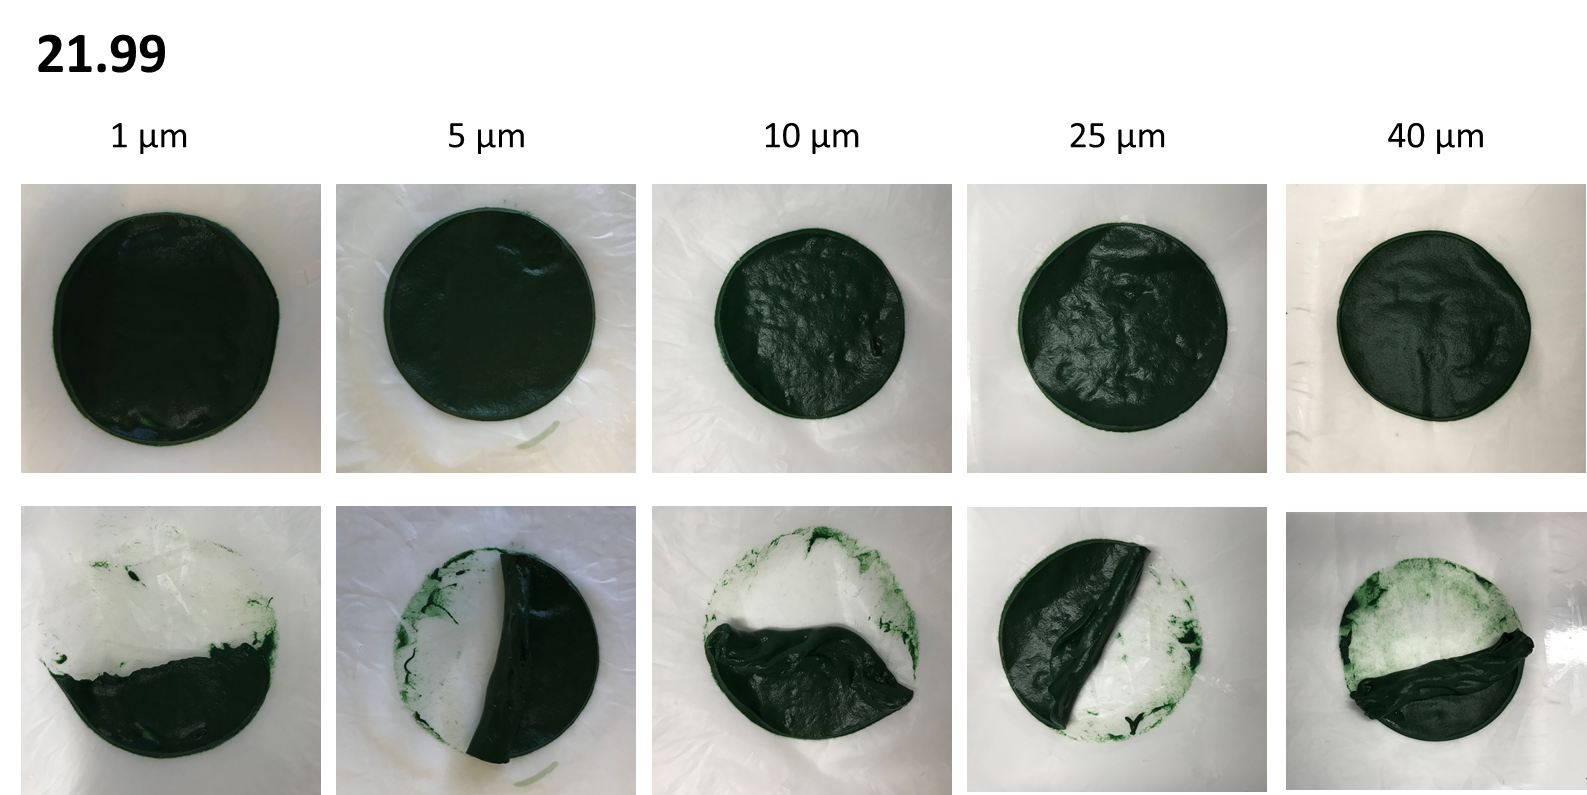


**Fig. S1.** Harvested biomass on membranes of different pore size after gravity filtration of the helical strain *Arthrospira* 21.99. Top images, intact formed cake. Bottom images, cake partially removed from membrane using a spatula.


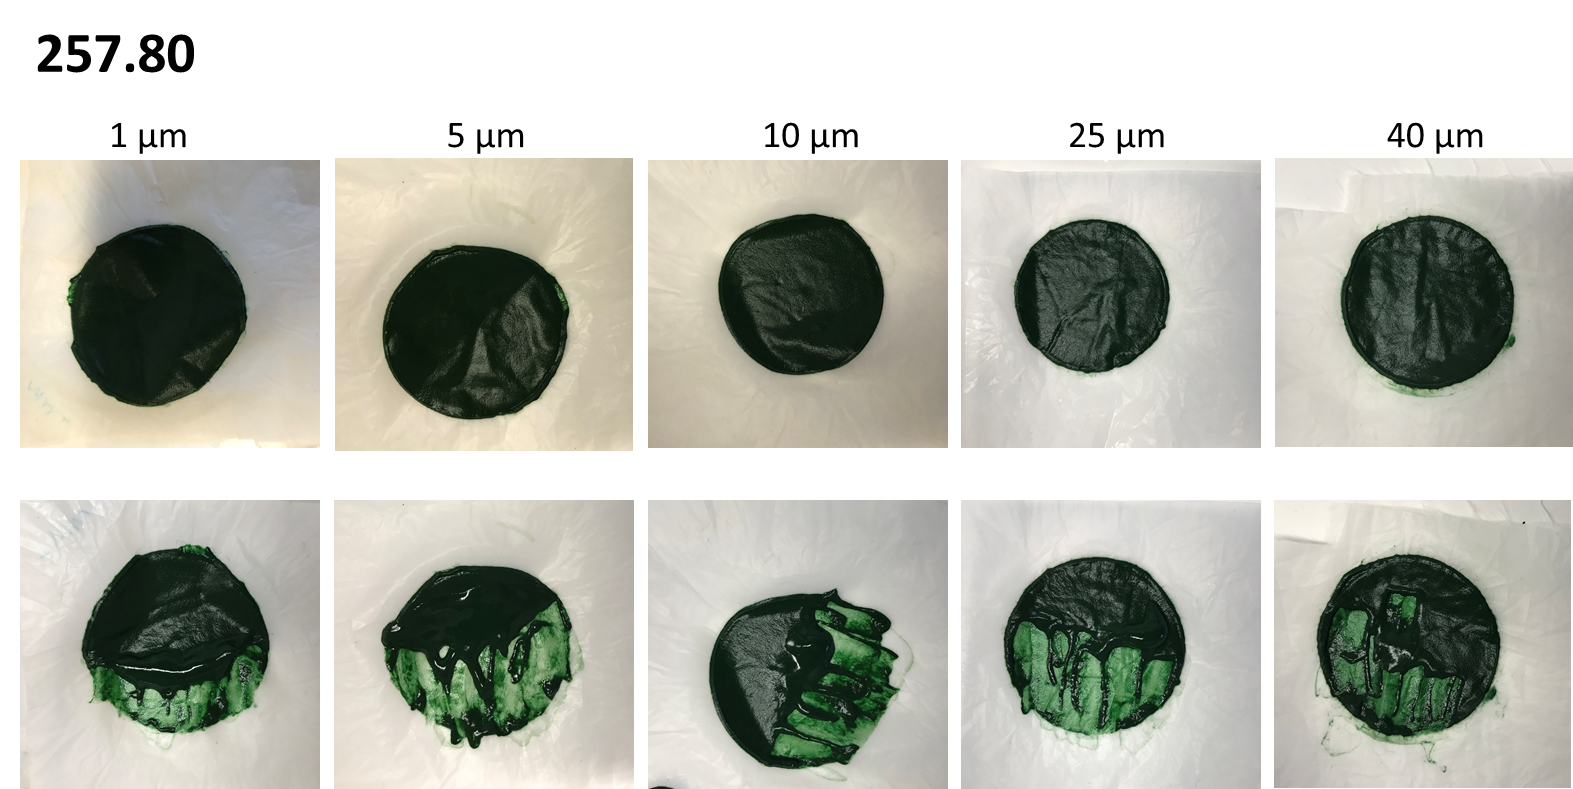


**Fig. S2.** Harvested biomass on membranes of different pore size after gravity filtration of the straight strain *Arthrospira* 257.80. Top images, intact formed cake. Bottom images, cake partially removed from membrane using a spatula.


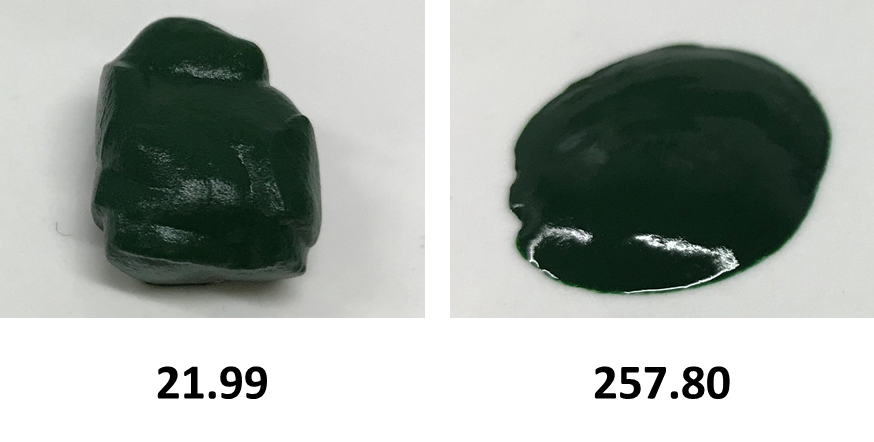


**Fig. S3.** Harvested biomass from the 10 µm filtration membrane after gravity filtration. *Arthrospira* 21.99 helical trichomes form a soft but well-shaped loose cake, while *Arthrospira* 257.80 straight trichomes form an irregular and liquid-texture cake.

**
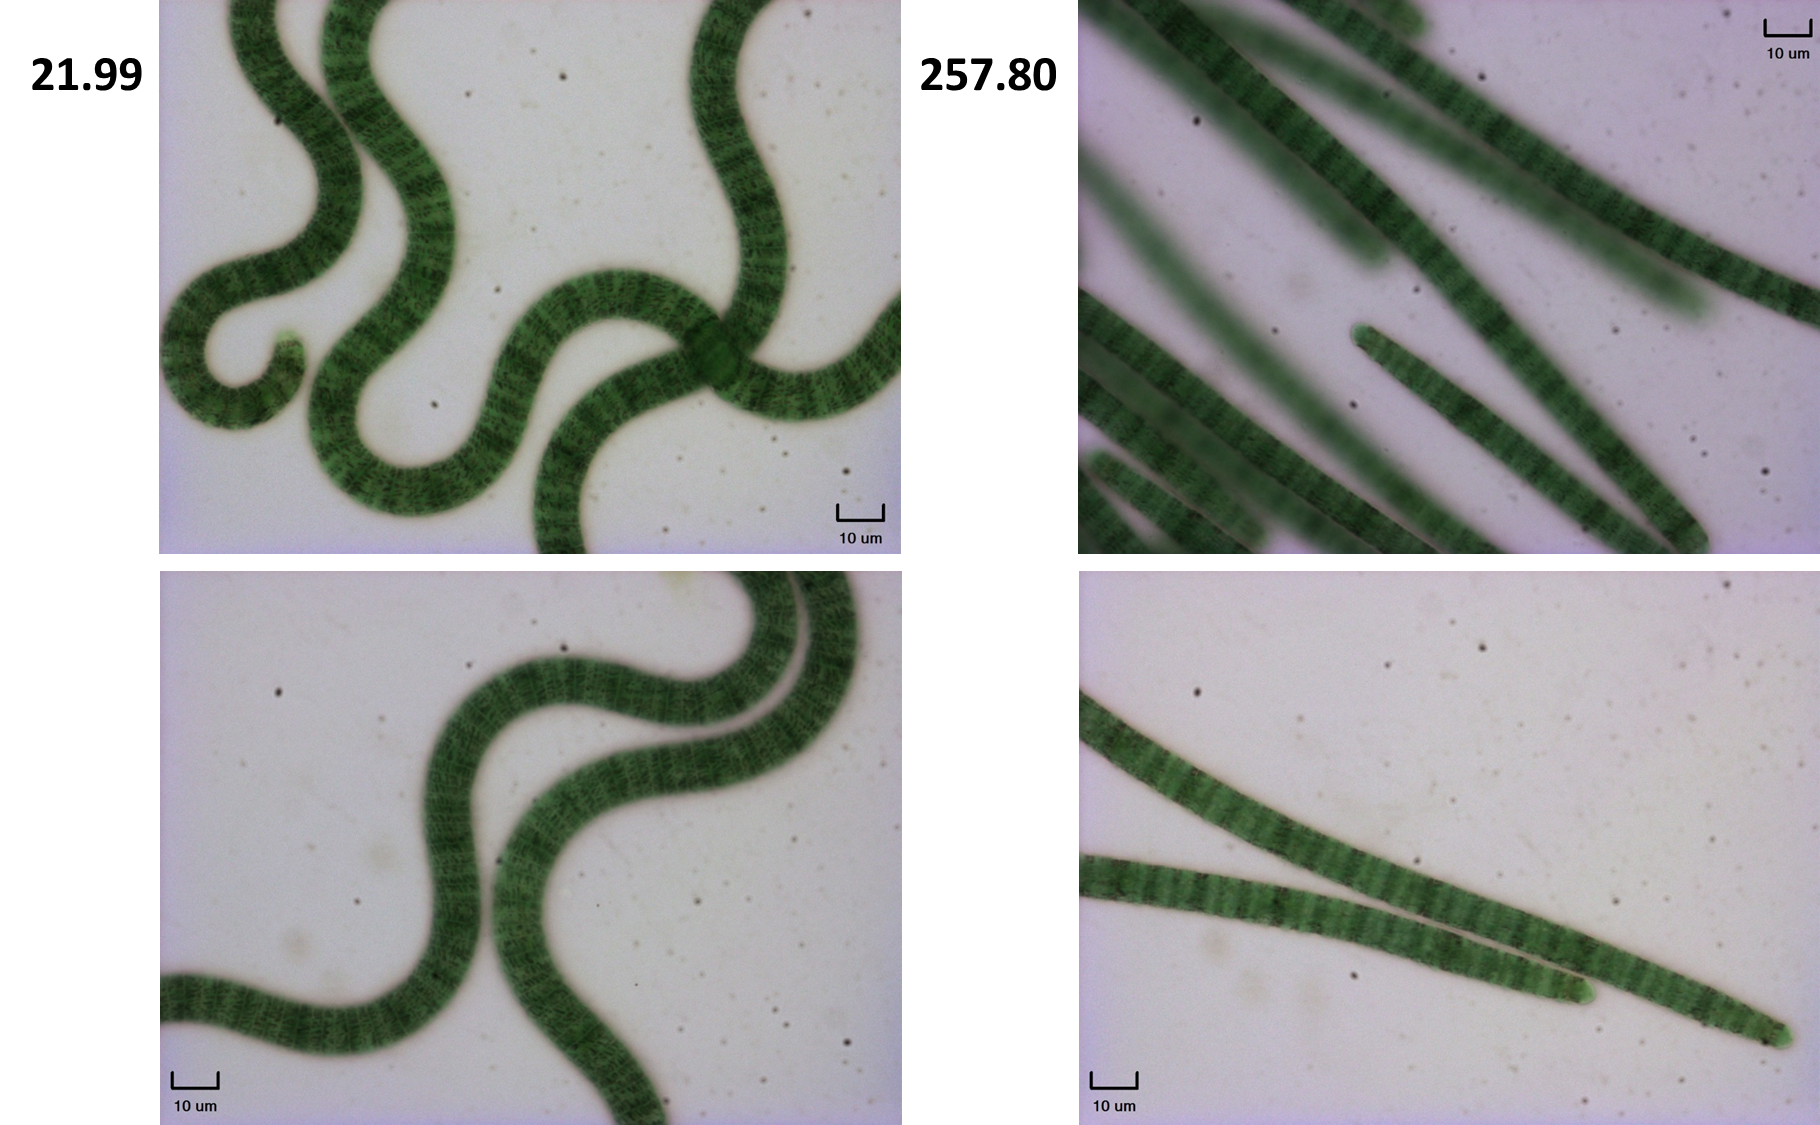
**

**Figure S4:** Microscopy images at 40x magnification. Presence of gas vacuoles (dark granulations) in trichomes of the helical strain 21.99 (left column) and in trichomes of the straight strain 257.80 (right column).
